# Supplementary material for: Silencing of DND1 in potato and tomato impedes conidial germination, attachment and hyphal growth of Botrytis cinerea
Source: PubMed Central journal article supplement (PMC5719932; doi:10.1186/s12870-017-1184-2), 2017-12-06
Supplement: 12870_2017_1184_MOESM1_ESM.pdf [file 12870_2017_1184_MOESM1_ESM.pdf]

**Table S1. Possible *Botrytis cinerea* S genes identified in Arabidopsis (according to van Schie and Takken [1])**

| Gene                                         | Plant species | Susceptibility mechanism                                                                                      | Reported pleiotropic phenotype                                                                                                                  | References |
|----------------------------------------------|---------------|---------------------------------------------------------------------------------------------------------------|-------------------------------------------------------------------------------------------------------------------------------------------------|------------|
| <i>LePG</i>                                  | Tomato        | Cell wall architecture of fruit affects penetration and colonization of <i>Botrytis</i>                       | Reduced fruit softening                                                                                                                         | [2]        |
| <i>LeEXP1</i>                                |               |                                                                                                               |                                                                                                                                                 |            |
| <i>LACS2/</i><br><i>SMA4/</i><br><i>BRE1</i> | Arabidopsis   | Cuticle permeability might affect diffusion of elicitors, ROS and defense compounds                           | Permeable cuticle, subtle leaf deformation and organ fusion, more susceptible to <i>Pseudomonas</i> , increased sensitivity to salt and drought | [3], [4]   |
| <i>RWA2</i>                                  | Arabidopsis   | Pathogen entry? Unknown, Cuticle/wall permeability affects diffusion of elicitors, ROS and defense compounds? | None reported                                                                                                                                   | [5]        |
| <i>FDH</i>                                   | Arabidopsis   | Cuticle permeability might affect diffusion of elicitors, ROS and defense compounds                           | Some organ fusion                                                                                                                               | [6]        |

|                |             |                                                                                                                                      |                                                                                                                                                                  |           |
|----------------|-------------|--------------------------------------------------------------------------------------------------------------------------------------|------------------------------------------------------------------------------------------------------------------------------------------------------------------|-----------|
| <i>LCR</i>     | Arabidopsis | Cuticle permeability might affect diffusion of elicitors, ROS and defense compounds                                                  | Some organ fusion                                                                                                                                                | [6], [7]  |
| <i>ATT1</i>    | Arabidopsis | Cuticle permeability might affect diffusion of elicitors, ROS and defense compounds                                                  | Permeable cuticle, increased susceptibility to <i>Pseudomonas</i>                                                                                                | [4], [8]  |
| <i>BDG</i>     | Arabidopsis | Cuticle permeability might affect diffusion of elicitors, ROS and defense compounds                                                  | Permeable cuticle, more sensitive to osmotic stress, narrow elongated leaves, smaller plants                                                                     | [6, 9-11] |
| <i>Sit</i>     | Tomato      | ABA affects cuticle composition and defense. Mutant has decreased ABA and increased cuticle permeability (and DAMP induced defense?) | Increased sensitivity to drought, wilting (open stomata), impaired interaction of (beneficial) arbuscular mycorrhizal fungi, early germination (e.g. viviparous) | [11-17]   |
| <i>CESA4/7</i> | Arabidopsis | Mutant has increased ABA/JA/Eth                                                                                                      | None reported                                                                                                                                                    | [18]      |
| <i>CESA8</i>   | Arabidopsis | Mutant has increased ABA/JA/Eth                                                                                                      | Increased ABA, enhanced drought tolerance                                                                                                                        | [18, 19]  |

|                              |             |                                                                                             |                                                                                                                                                                        |             |
|------------------------------|-------------|---------------------------------------------------------------------------------------------|------------------------------------------------------------------------------------------------------------------------------------------------------------------------|-------------|
| <i>MYB46</i>                 | Arabidopsis | Regulates CESA4/7/8, CSLA9;<br>probable DAMP induced defense<br>suppression                 | None reported                                                                                                                                                          | [20-22]     |
| <i>DND1/2</i>                | Arabidopsis | Defense suppression, HR and positive<br>regulator of NO synthesis                           | Smaller plant, early senescence, moderate lesion<br>mimic                                                                                                              | [23-28]     |
| <i>SRI/</i><br><i>CAMTA3</i> | Arabidopsis | Defense suppression SA                                                                      | Smaller plants [abolished at higher temp], increased<br>susceptibility to insect feeding ( <i>Trichoplusia</i> ,<br><i>Bradysia</i> ), possible reduced cold tolerance | [20, 29-34] |
| <i>RST1</i>                  | Arabidopsis | Defense suppression JA; mutant has<br>increased free (cuticular) lipids and<br>increased JA | Increased sensitivity to biotroph powdery mildew (E.<br>cichoracearum), increased embryo abortion, reduced<br>storage lipids in seed                                   | [19, 35]    |
| <i>PLP2</i>                  | Arabidopsis | Defense suppression, cell death<br>(oxylipin mediated)                                      | Increased sensitivity to virus (Cucumber mosaic<br>virus), no developmental phenotype reported                                                                         | [36, 37]    |

---

## References

1. van Schie CC, Takken FL: Susceptibility genes 101: how to be a good host. *Annual review of phytopathology* 2014, 52:551-581.
2. Cantu D, Vicente A, Greve L, Dewey F, Bennett A, Labavitch J, Powell A: The intersection between cell wall disassembly, ripening, and fruit susceptibility to *Botrytis cinerea*. *Proceedings of the National Academy of Sciences* 2008, 105(3):859-864.
3. Bessire M, Chassot C, Jacquat AC, Humphry M, Borel S, Petétot JMC, Métraux JP, Nawrath C: A permeable cuticle in Arabidopsis leads to a strong resistance to *Botrytis cinerea*. *The EMBO Journal* 2007, 26(8):2158-2168.
4. Tang D, Simonich MT, Innes RW: Mutations in LACS2, a long-chain acyl-coenzyme A synthetase, enhance susceptibility to avirulent *Pseudomonas syringae* but confer resistance to *Botrytis cinerea* in Arabidopsis. *Plant Physiology* 2007, 144(2):1093-1103.
5. Manabe Y, Nafisi M, Verhertbruggen Y, Orfila C, Gille S, Rautengarten C, Cherk C, Marcus SE, Somerville S, Pauly M: Loss-of-function mutation of REDUCED WALL ACETYLATION2 in Arabidopsis leads to reduced cell wall acetylation and increased resistance to *Botrytis cinerea*. *Plant physiology* 2011, 155(3):1068-1078.
6. Voisin D, Nawrath C, Kurdyukov S, Franke RB, Reina-Pinto JJ, Efremova N, Will I, Schreiber L, Yephremov A: Dissection of the complex phenotype in cuticular mutants of Arabidopsis reveals a role of SERRATE as a mediator. 2009.
7. Wellesen K, Durst F, Pinot F, Benveniste I, Nettesheim K, Wisman E, Steiner-Lange S, Saedler H, Yephremov A: Functional analysis of the LACERATA gene of Arabidopsis provides evidence for different roles of fatty acid  $\omega$ -hydroxylation in development. *Proceedings of the National Academy of Sciences* 2001, 98(17):9694-9699.

8. Xiao F, Goodwin SM, Xiao Y, Sun Z, Baker D, Tang X, Jenks MA, Zhou JM: Arabidopsis CYP86A2 represses *Pseudomonas syringae* type III genes and is required for cuticle development. *The EMBO journal* 2004, 23(14):2903-2913.
9. Kurdyukov S, Faust A, Nawrath C, Bär S, Voisin D, Efremova N, Franke R, Schreiber L, Saedler H, Métraux J-P: The epidermis-specific extracellular BODYGUARD controls cuticle development and morphogenesis in Arabidopsis. *The Plant Cell* 2006, 18(2):321-339.
10. Wang D, Dong X: A highway for war and peace: the secretory pathway in plant–microbe interactions. *Molecular plant* 2011, 4(4):581-587.
11. Asselbergh B, Achuo AE, Höfte M, Van Gijsegem F: Abscisic acid deficiency leads to rapid activation of tomato defence responses upon infection with *Erwinia chrysanthemi*. *Molecular Plant Pathology* 2008, 9(1):11-24.
12. Curvers K, Seifi H, Mouille G, De Rycke R, Asselbergh B, Van Hecke A, Vanderschaeghe D, Höfte H, Callewaert N, Van Breusegem F: Abscisic acid deficiency causes changes in cuticle permeability and pectin composition that influence tomato resistance to *Botrytis cinerea*. *Plant Physiology* 2010, 154(2):847-860.
13. Groot SP, Karssen CM: Dormancy and germination of abscisic acid-deficient tomato seeds Studies with the sitiens mutant. *Plant Physiology* 1992, 99(3):952-958.
14. Harrison E, Burbidge A, Okyere J, Thompson AJ, Taylor IB: Identification of the tomato ABA-deficient mutant sitiens as a member of the ABA-aldehyde oxidase gene family using genetic and genomic analysis. *Plant Growth Regulation* 2011, 64(3):301-309.
15. Herrera-Medina MJ, Steinkellner S, Vierheilig H, Ocampo Bote JA, García Garrido JM: Abscisic acid determines arbuscule development and functionality in the tomato arbuscular mycorrhiza. *New Phytologist* 2007, 175(3):554-564.

16. Tal M: Abnormal stomatal behavior in wilted mutants of tomato. *Plant Physiology* 1966, 41(8):1387-1391.
17. Audenaert K, De Meyer GB, Höfte MM: Abscisic acid determines basal susceptibility of tomato to *Botrytis cinerea* and suppresses salicylic acid-dependent signaling mechanisms. *Plant Physiology* 2002, 128(2):491-501.
18. Hernández-Blanco C, Feng DX, Hu J, Sánchez-Vallet A, Deslandes L, Llorente F, Berrocal-Lobo M, Keller H, Barlet X, Sánchez-Rodríguez C: Impairment of cellulose synthases required for Arabidopsis secondary cell wall formation enhances disease resistance. *The Plant Cell* 2007, 19(3):890-903.
19. Chen X, Goodwin SM, Liu X, Chen X, Bressan RA, Jenks MA: Mutation of the RESURRECTION1 locus of Arabidopsis reveals an association of cuticular wax with embryo development. *Plant physiology* 2005, 139(2):909-919.
20. Kim WC, Ko JH, Kim JY, Kim J, Bae HJ, Han KH: MYB46 directly regulates the gene expression of secondary wall-associated cellulose synthases in Arabidopsis. *The Plant Journal* 2013, 73(1):26-36.
21. Ramírez V, Agorio A, Coego A, García-Andrade J, Hernández MJ, Balaguer B, Ouwkerk PB, Zarra I, Vera P: MYB46 modulates disease susceptibility to *Botrytis cinerea* in Arabidopsis. *Plant Physiology* 2011, 155(4):1920-1935.
22. Ramírez V, García-Andrade J, Vera P: Enhanced disease resistance to *Botrytis cinerea* in myb46 Arabidopsis plants is associated to an early down-regulation of Cesa genes. *Plant signaling & behavior* 2011, 6(6):911-913.
23. Ahn IP: Disturbance of the Ca<sup>2+</sup>/calmodulin-dependent signalling pathway is responsible for the resistance of Arabidopsis dnd1 against *Pectobacterium carotovorum* infection. *Molecular plant pathology* 2007, 8(6):747-759.

24. Clough SJ, Fengler KA, Yu I-c, Lippok B, Smith RK, Bent AF: The Arabidopsis dnd1 “defense, no death” gene encodes a mutated cyclic nucleotide-gated ion channel. *Proceedings of the National Academy of Sciences* 2000, 97(16):9323-9328.
25. Genger RK, Jurkowski GI, McDowell JM, Lu H, Jung HW, Greenberg JT, Bent AF: Signaling pathways that regulate the enhanced disease resistance of Arabidopsis “defense, no death” mutants. *Molecular Plant-Microbe Interactions* 2008, 21(10):1285-1296.
26. Govrin EM, Levine A: The hypersensitive response facilitates plant infection by the necrotrophic pathogen *Botrytis cinerea*. *Current biology* 2000, 10(13):751-757.
27. Jurkowski GI, Smith Jr RK, Yu I-c, Ham JH, Sharma SB, Klessig DF, Fengler KA, Bent AF: Arabidopsis DND2, a second cyclic nucleotide-gated ion channel gene for which mutation causes the “defense, no death” phenotype. *Molecular plant-microbe interactions* 2004, 17(5):511-520.
28. Su’udi M, Kim MG, Park S-R, Hwang D-J, Bae S-C, Ahn I-P: Arabidopsis cell death in compatible and incompatible interactions with *Alternaria brassicicola*. *Molecules and cells* 2011, 31(6):593-601.
29. Doherty CJ, Van Buskirk HA, Myers SJ, Thomashow MF: Roles for Arabidopsis CAMTA transcription factors in cold-regulated gene expression and freezing tolerance. *The Plant Cell* 2009, 21(3):972-984.
30. Du L, Ali GS, Simons KA, Hou J, Yang T, Reddy A, Poovaiah B: Ca<sup>2+</sup>/calmodulin regulates salicylic-acid-mediated plant immunity. *Nature* 2009, 457(7233):1154-1158.

31. Galon Y, Nave R, Boyce JM, Nachmias D, Knight MR, Fromm H: Calmodulin-binding transcription activator (CAMTA) 3 mediates biotic defense responses in Arabidopsis. *FEBS letters* 2008, 582(6):943-948.
32. Laluk K, Prasad K, Savchenko T, Celesnik H, Dehesh K, Levy M, Mitchell-Olds T, Reddy A: The calmodulin-binding transcription factor SIGNAL RESPONSIVE1 is a novel regulator of glucosinolate metabolism and herbivory tolerance in Arabidopsis. *Plant and Cell Physiology* 2012, 53(12):2008-2015.
33. Nie H, Zhao C, Wu G, Wu Y, Chen Y, Tang D: SR1, a calmodulin-binding transcription factor, modulates plant defense and ethylene-induced senescence by directly regulating NDR1 and EIN3. *Plant physiology* 2012, 158(4):1847-1859.
34. Qiu Y, Xi J, Du L, Suttle JC, Poovaiah B: Coupling calcium/calmodulin-mediated signaling and herbivore-induced plant response through calmodulin-binding transcription factor AtSR1/CAMTA3. *Plant molecular biology* 2012, 79(1-2):89-99.
35. Mang HG, Laluk KA, Parsons EP, Kosma DK, Cooper BR, Park HC, AbuQamar S, Bocconcelli C, Miyazaki S, Consiglio F: The Arabidopsis RESURRECTION1 gene regulates a novel antagonistic interaction in plant defense to biotrophs and necrotrophs. *Plant physiology* 2009, 151(1):290-305.
36. Camera SL, Balagué C, Göbel C, Geoffroy P, Legrand M, Feussner I, Roby D, Heitz T: The Arabidopsis patatin-like protein 2 (PLP2) plays an essential role in cell death execution and differentially affects biosynthesis of oxylipins and resistance to pathogens. *Molecular plant-microbe interactions* 2009, 22(4):469-481.



37. La Camera S, Geoffroy P, Samaha H, Ndiaye A, Rahim G, Legrand M, Heitz T: A pathogen-inducible patatin-like lipid acyl hydrolase facilitates fungal and bacterial host colonization in Arabidopsis. *The Plant Journal* 2005, 44(5):810-825.
