# Supplementary material for: Silencing of DND1 in potato and tomato impedes conidial germination, attachment and hyphal growth of Botrytis cinerea
Source: PubMed Central journal article supplement (PMC5719932; doi:10.1186/s12870-017-1184-2), 2017-12-06
Supplement: 12870_2017_1184_MOESM5_ESM.pdf [file 12870_2017_1184_MOESM5_ESM.pdf]

**Table S2. Primers used in this study**

| Primer name       | Sequence (5'-3')           | Used for                               |
|-------------------|----------------------------|----------------------------------------|
| Fw-Botrytis Actin | TCTGTCTTGGGTCTTGAGAG       | <i>Botrytis cinerea</i> normalisation  |
| Rv-Botrytis Actin | GGTGCAAGAGCAGTGATTTC       |                                        |
| Fw-Bcpg1          | AAC GTG GTA CCG CCT GTA CC | determining relative transcript levels |
| Rv-Bcpg1          | AGC CTT GGA CTT GGA AGC G  |                                        |
| Fw-BccutA         | CCTCCTTCCTCTCTCCGTCT       |                                        |
| Rv-BccutA         | GCTGGGTAGTCGACACCATT       |                                        |
